# Supplementary material for: Solvatochromism and acidochromism of azobenzene-functionalized poly(vinyl amines)
Source: Royal Society of Chemistry journal article supplement (doi:10.1039/c2nj40313g), 2012-01-01
Supplement: c2nj40313g.pdf [file c2nj40313g.pdf]

## Supporting Information for

# Solvatochromism and Acidochromism of Azobenzene- Functionalized Poly(vinyl amines)

*Katja Hofmann<sup>a</sup>, Susann Brumm<sup>a</sup>, Carola Mende<sup>a</sup>, Kevin Nagel<sup>a</sup>, Andreas Seifert<sup>a</sup>, Isabelle Roth<sup>b</sup>, Dieter Schaarschmidt<sup>c</sup>, Heinrich Lang<sup>c</sup>, Stefan Spange<sup>a\*</sup>*

<sup>a</sup>Department of Polymer Chemistry, University of Technology Chemnitz, Straße der Nationen 62, 09111 Chemnitz, Germany

<sup>b</sup>Department of Lightweight Structures and Polymer Technology, University of Technology, Reichenhainer Str. 70, 09126 Chemnitz, Germany

<sup>c</sup>Department of Inorganic Chemistry, University of Technology Chemnitz, Straße der Nationen 62, 09111 Chemnitz, Germany

[stefan.spange@chemie.tu-chemnitz.de](mailto:stefan.spange@chemie.tu-chemnitz.de); Fax: + 49 371 531 21239; Tel: + 49 371 531 21230

### Content.

Crystal data of **5M**

IR spectra of **PVAm**, **5P**, and **5M**

Thermal analysis of **2M–5M** and **2P–5P**

UV/Vis absorption maxima of **2M–5M** and Kamlet–Taft parameter set

UV/Vis absorption measurements in the solid state of **2M–5M** and **2P–5P**

**Table S1:** Crystallographic data and collection parameters for **5M**.

|                                                      |                                                               |
|------------------------------------------------------|---------------------------------------------------------------|
| empirical formula                                    | C <sub>15</sub> H <sub>14</sub> N <sub>6</sub> O <sub>6</sub> |
| formula weight                                       | 374.32                                                        |
| colour                                               | red                                                           |
| wavelength (Å)                                       | 1.54184                                                       |
| temperature (K)                                      | 100                                                           |
| crystal system                                       | monoclinic                                                    |
| space group                                          | C2                                                            |
| <i>a</i> [Å]                                         | 13.8296(5)                                                    |
| <i>b</i> [Å]                                         | 6.6323(2)                                                     |
| <i>c</i> [Å]                                         | 35.6388(12)                                                   |
| $\alpha$ [°]                                         | 90                                                            |
| $\beta$ [°]                                          | 90.160(3)                                                     |
| $\gamma$ [°]                                         | 90                                                            |
| volume (Å <sup>3</sup> )                             | 3268.85(19)                                                   |
| Z                                                    | 8                                                             |
| calcd. density (g*cm <sup>-3</sup> )                 | 1.521                                                         |
| absorption coefficient (mm <sup>-1</sup> )           | 1.033                                                         |
| <i>F</i> (000)                                       | 1552                                                          |
| crystal size (mm <sup>3</sup> )                      | 0.40 x 0.06 x 0.04                                            |
| $\theta$ range for data collection(°)                | 3.27–62.49                                                    |
| index ranges                                         | –15≤ <i>h</i> ≤15, –7≤ <i>k</i> ≤6, –41≤ <i>l</i> ≤41         |
| reflections collected                                | 10647                                                         |
| independent reflections                              | 3970                                                          |
| <i>R</i> <sub>int</sub>                              | 0.0268                                                        |
| data/restraints/parameter                            | 3970/1/495                                                    |
| refinement method                                    | full-matrix least-squares on <i>F</i> <sup>2</sup>            |
| goodness-of-fit on <i>F</i> <sup>2</sup>             | 0.995                                                         |
| final <i>R</i> indicates [ <i>I</i> >2σ( <i>I</i> )] | <i>R</i> 1 = 0.0283, <i>wR</i> 2 = 0.0673                     |
| <i>R</i> indicates all data                          | <i>R</i> 1 = 0.0325, <i>wR</i> 2 = 0.0683                     |
| absolute structure parameter                         | 0.34(13)                                                      |
| largest diff. peak and hole (e* Å <sup>-3</sup> )    | 0.158, –0.204                                                 |

Some difficulties have been encountered in the determination of the crystal system and space group for **5M**. In particular, the question was raised whether **5M** crystallized in an orthorhombic or monoclinic lattice. While the beta angle significantly deviated from 90 °, the comparison of symmetry equivalent reflections suggested the Laue symmetry *mmm*. Space

group determination after integration in an orthorhombic lattice resulted in centrosymmetric *Cmca* or non-centrosymmetric *Aba2* due to the systematic absence of reflections. In *Cmca* no reasonable solution was found. In contrast, using *Aba2* a solution was obtained with one molecule **5M** in the asymmetric unit statistically disordered (ratio 0.51:0.49) on two positions (parallel orientation). However, the resulting structural parameters:  $R_1$  0.2195,  $wR_2$  0.5128, GOF 2.91, residual electron density 0.57 and  $-1.22$ , absolute structure parameter 0.2(9) indicate that *Aba2* is the wrong space group and hence orthorhombic is the wrong lattice. It is commonly observed that a monoclinic lattice with beta angle of approximately  $90^\circ$  may emulate orthorhombic. Space group determination in a monoclinic lattice revealed *C2*, *C2/c* and *Cm* as possible space groups. Only in case of *C2* a reasonable solution was found.

**Table S2.** Bond lengths /Å for **5M**.

---

|             |          |              |          |
|-------------|----------|--------------|----------|
| C(1)-N(1)   | 1.473(2) | C(16)-N(7)   | 1.466(3) |
| C(1)-C(3)   | 1.513(3) | C(16)-C(18)  | 1.518(3) |
| C(1)-C(2)   | 1.518(3) | C(16)-C(17)  | 1.519(3) |
| C(1)-H(1)   | 0.9800   | C(16)-H(16)  | 0.9800   |
| C(2)-H(2A)  | 0.9600   | C(17)-H(17A) | 0.9600   |
| C(2)-H(2B)  | 0.9600   | C(17)-H(17B) | 0.9600   |
| C(2)-H(2C)  | 0.9600   | C(17)-H(17C) | 0.9600   |
| C(3)-H(3A)  | 0.9600   | C(18)-H(17A) | 0.9600   |
| C(3)-H(3B)  | 0.9600   | C(18)-H(17B) | 0.9600   |
| C(3)-H(3C)  | 0.9600   | C(18)-H(17C) | 0.9600   |
| C(4)-N(1)   | 1.337(2) | C(19)-N(7)   | 1.330(3) |
| C(4)-C(9)   | 1.428(3) | C(19)-C(20)  | 1.434(3) |
| C(4)-C(5)   | 1.441(2) | C(19)-C(24)  | 1.441(2) |
| C(5)-C(6)   | 1.385(2) | C(20)-C(21)  | 1.386(3) |
| C(5)-N(2)   | 1.445(2) | C(20)-N(8)   | 1.454(2) |
| C(6)-C(7)   | 1.381(3) | C(21)-C(22)  | 1.388(2) |
| C(6)-H(6)   | 0.9300   | C(21)-H(21)  | 0.9300   |
| C(7)-N(3)   | 1.404(2) | C(22)-N(9)   | 1.397(2) |
| C(7)-C(8)   | 1.417(2) | C(22)-C(23)  | 1.415(3) |
| C(8)-C(9)   | 1.362(2) | C(23)-C(24)  | 1.358(3) |
| C(8)-H(8)   | 0.9300   | C(23)-H(23)  | 0.9300   |
| C(9)-H(9)   | 0.9300   | C(24)-H(24)  | 0.9300   |
| C(10)-C(15) | 1.389(2) | C(25)-C(30)  | 1.398(2) |
| C(10)-C(11) | 1.401(2) | C(25)-C(26)  | 1.399(3) |
| C(10)-N(4)  | 1.427(2) | C(25)-N(10)  | 1.418(2) |
| C(11)-C(12) | 1.382(3) | C(26)-C(27)  | 1.378(3) |
| C(11)-H(11) | 0.9300   | C(26)-H(26)  | 0.9300   |
| C(12)-C(13) | 1.388(3) | C(27)-C(28)  | 1.397(2) |
| C(12)-H(12) | 0.9300   | C(27)-H(27)  | 0.9300   |
| C(13)-C(14) | 1.385(2) | C(28)-C(29)  | 1.378(3) |
| C(13)-N(5)  | 1.471(2) | C(28)-N(11)  | 1.470(2) |
| C(14)-C(15) | 1.383(3) | C(29)-C(30)  | 1.376(3) |
| C(14)-H(14) | 0.9300   | C(29)-H(29)  | 0.9300   |
| C(15)-N(6)  | 1.473(2) | C(30)-N(12)  | 1.474(2) |
| N(1)-H(1N)  | 0.80(3)  | N(7)-H(7N)   | 0.80(2)  |
| N(2)-O(2)   | 1.234(2) | N(8)-O(8)    | 1.228(2) |
| N(2)-O(1)   | 1.238(2) | N(8)-O(7)    | 1.236(2) |
| N(3)-N(4)   | 1.258(2) | N(9)-N(10)   | 1.267(2) |
| N(5)-O(4)   | 1.217(2) | N(11)-O(10)  | 1.222(2) |
| N(5)-O(3)   | 1.226(2) | N(11)-O(9)   | 1.224(2) |
| N(6)-O(5)   | 1.210(2) | N(12)-O(12)  | 1.213(3) |
| N(6)-O(6)   | 1.223(2) | N(12)-O(11)  | 1.221(3) |

---

**Table S3.** Bond angles /deg for **5M**.

|                   |            |                     |            |
|-------------------|------------|---------------------|------------|
| N(1)-C(1)-C(3)    | 110.11(17) | N(7)-C(16)-C(18)    | 110.16(17) |
| N(1)-C(1)-C(2)    | 108.16(16) | N(7)-C(16)-C(17)    | 108.10(16) |
| C(3)-C(1)-C(2)    | 112.83(17) | C(18)-C(16)-C(17)   | 112.92(17) |
| N(1)-C(1)-H(1)    | 108.5      | N(7)-C(16)-H(16)    | 108.5      |
| C(3)-C(1)-H(1)    | 108.5      | C(18)-C(16)-H(16)   | 108.5      |
| C(2)-C(1)-H(1)    | 108.5      | C(17)-C(16)-H(16)   | 108.5      |
| C(1)-C(2)-H(2A)   | 109.5      | C(16)-C(17)-H(17A)  | 109.5      |
| C(1)-C(2)-H(2B)   | 109.5      | C(16)-C(17)-H(17B)  | 109.5      |
| H(2A)-C(2)-H(2B)  | 109.5      | H(17A)-C(17)-H(17B) | 109.5      |
| C(1)-C(2)-H(2C)   | 109.5      | C(16)-C(17)-H(17A)  | 109.5      |
| H(2A)-C(2)-H(2C)  | 109.5      | H(17A)-C(17)-H(17C) | 109.5      |
| H(2B)-C(2)-H(2C)  | 109.5      | H(17B)-C(17)-H(17C) | 109.5      |
| C(1)-C(3)-H(3A)   | 109.5      | C(16)-C(18)-H(18A)  | 109.5      |
| C(1)-C(3)-H(3B)   | 109.5      | C(16)-C(18)-H(18B)  | 109.5      |
| H(3A)-C(3)-H(3B)  | 109.5      | H(18A)-C(18)-H(18B) | 109.5      |
| C(1)-C(3)-H(3C)   | 109.5      | C(16)-C(18)-H(18C)  | 109.5      |
| H(3A)-C(3)-H(3C)  | 109.5      | H(18A)-C(18)-H(18C) | 109.5      |
| H(3B)-C(3)-H(3C)  | 109.5      | H(18B)-C(18)-H(18C) | 109.5      |
| N(1)-C(4)-C(9)    | 120.98(16) | N(7)-C(19)-C(20)    | 123.83(16) |
| N(1)-C(4)-C(5)    | 123.65(16) | N(7)-C(19)-C(24)    | 120.96(16) |
| C(9)-C(4)-C(5)    | 115.36(15) | C(20)-C(19)-C(24)   | 115.19(16) |
| C(6)-C(5)-C(4)    | 121.45(15) | C(21)-C(20)-C(19)   | 121.67(15) |
| C(6)-C(5)-N(2)    | 116.42(14) | C(21)-C(20)-N(8)    | 116.23(15) |
| C(4)-C(5)-N(2)    | 122.13(15) | C(19)-C(20)-N(8)    | 122.10(15) |
| C(7)-C(6)-C(5)    | 121.20(15) | C(20)-C(21)-C(22)   | 121.10(16) |
| C(7)-C(6)-H(6)    | 119.4      | C(20)-C(21)-H(21)   | 119.4      |
| C(5)-C(6)-H(6)    | 119.4      | C(22)-C(21)-H(21)   | 119.4      |
| C(6)-C(7)-N(3)    | 115.30(15) | C(21)-C(22)-N(9)    | 115.39(15) |
| C(6)-C(7)-C(8)    | 118.80(15) | C(21)-C(22)-C(23)   | 118.74(16) |
| N(3)-C(7)-C(8)    | 125.89(15) | N(9)-C(22)-C(23)    | 125.87(15) |
| C(9)-C(8)-C(7)    | 120.68(16) | C(24)-C(23)-C(22)   | 120.80(16) |
| C(9)-C(8)-H(8)    | 119.7      | C(24)-C(23)-H(23)   | 119.6      |
| C(7)-C(8)-H(8)    | 119.7      | C(22)-C(23)-H(23)   | 119.6      |
| C(8)-C(9)-C(4)    | 122.48(16) | C(23)-C(24)-C(19)   | 122.47(16) |
| C(8)-C(9)-H(9)    | 118.8      | C(23)-C(24)-H(24)   | 118.8      |
| C(4)-C(9)-H(9)    | 118.8      | C(19)-C(24)-H(24)   | 118.8      |
| C(15)-C(10)-C(11) | 118.30(15) | C(30)-C(25)-C(26)   | 117.99(16) |
| C(15)-C(10)-N(4)  | 116.58(14) | C(30)-C(25)-N(10)   | 116.83(15) |
| C(11)-C(10)-N(4)  | 125.07(16) | C(26)-C(25)-N(10)   | 125.12(15) |
| C(12)-C(11)-C(10) | 119.93(16) | C(27)-C(26)-C(25)   | 120.04(15) |
| C(12)-C(11)-H(11) | 120.0      | C(27)-C(26)-H(26)   | 120.0      |
| C(10)-C(11)-H(11) | 120.0      | C(25)-C(26)-H(26)   | 120.0      |
| C(11)-C(12)-C(13) | 119.56(15) | C(26)-C(27)-C(28)   | 119.39(16) |
| C(11)-C(12)-H(12) | 120.2      | C(26)-C(27)-H(27)   | 120.3      |
| C(13)-C(12)-H(12) | 120.2      | C(28)-C(27)-H(27)   | 120.3      |
| C(14)-C(13)-C(12) | 122.35(15) | C(29)-C(28)-C(27)   | 122.48(16) |
| C(14)-C(13)-N(5)  | 118.13(15) | C(29)-C(28)-N(11)   | 118.13(15) |
| C(12)-C(13)-N(5)  | 119.52(15) | C(27)-C(28)-N(11)   | 119.39(15) |
| C(15)-C(14)-C(13) | 116.65(16) | C(30)-C(29)-C(28)   | 116.60(16) |
| C(15)-C(14)-H(14) | 121.7      | C(30)-C(29)-H(29)   | 121.7      |
| C(13)-C(14)-H(14) | 121.7      | C(28)-C(29)-H(29)   | 121.7      |
| C(14)-C(15)-C(10) | 123.18(15) | C(29)-C(30)-C(25)   | 123.47(16) |
| C(14)-C(15)-N(6)  | 117.29(15) | C(29)-C(30)-N(12)   | 117.32(15) |
| C(10)-C(15)-N(6)  | 119.53(14) | C(25)-C(30)-N(12)   | 119.22(15) |
| C(4)-N(1)-C(1)    | 125.72(16) | C(19)-N(7)-C(16)    | 125.74(15) |
| C(4)-N(1)-H(1N)   | 116.0(15)  | C(19)-N(7)-H(7N)    | 118.9(17)  |
| C(1)-N(1)-H(1N)   | 118.1(14)  | C(16)-N(7)-H(7N)    | 115.3(17)  |
| O(2)-N(2)-O(1)    | 122.07(15) | O(8)-N(8)-O(7)      | 121.96(14) |

|                 |            |                   |            |
|-----------------|------------|-------------------|------------|
| O(2)-N(2)-C(5)  | 118.62(14) | O(8)-N(8)-C(20)   | 118.73(15) |
| O(1)-N(2)-C(5)  | 119.31(14) | O(7)-N(8)-C(20)   | 119.31(15) |
| N(4)-N(3)-C(7)  | 114.52(14) | N(10)-N(9)-C(22)  | 114.82(14) |
| N(3)-N(4)-C(10) | 112.17(14) | N(9)-N(10)-C(25)  | 112.42(14) |
| O(4)-N(5)-O(3)  | 124.01(14) | O(10)-N(11)-O(9)  | 124.17(15) |
| O(4)-N(5)-C(13) | 118.14(14) | O(10)-N(11)-C(28) | 118.13(15) |
| O(3)-N(5)-C(13) | 117.85(15) | O(9)-N(11)-C(28)  | 117.70(14) |
| O(5)-N(6)-O(6)  | 124.60(15) | O(12)-N(12)-O(11) | 124.75(15) |
| O(5)-N(6)-C(15) | 118.13(17) | O(12)-N(12)-C(30) | 117.92(17) |
| O(6)-N(6)-C(15) | 117.26(16) | O(11)-N(12)-C(30) | 117.30(17) |

---

**Table S4.** Torsion angles /deg for **5M**

|                           |             |                           |             |
|---------------------------|-------------|---------------------------|-------------|
| N(1)-C(4)-C(5)-C(6)       | 177.5(2)    | N(7)-C(19)-C(20)-C(21)    | -177.4(2)   |
| C(9)-C(4)-C(5)-C(6)       | -1.4(3)     | C(24)-C(19)-C(20)-C(21)   | 1.3(3)      |
| N(1)-C(4)-C(5)-N(2)       | -2.7(3)     | N(7)-C(19)-C(20)-N(8)     | 3.1(3)      |
| C(9)-C(4)-C(5)-N(2)       | 178.4(2)    | C(24)-C(19)-C(20)-N(8)    | -178.25(19) |
| C(4)-C(5)-C(6)-C(7)       | 0.0(3)      | C(19)-C(20)-C(21)-C(22)   | 0.3(3)      |
| N(2)-C(5)-C(6)-C(7)       | -179.90(19) | N(8)-C(20)-C(21)-C(22)    | 179.81(18)  |
| C(5)-C(6)-C(7)-N(3)       | -179.55(19) | C(20)-C(21)-C(22)-N(9)    | 179.58(19)  |
| C(5)-C(6)-C(7)-C(8)       | 0.9(3)      | C(20)-C(21)-C(22)-C(23)   | -1.1(3)     |
| C(6)-C(7)-C(8)-C(9)       | -0.2(3)     | C(21)-C(22)-C(23)-C(24)   | 0.4(3)      |
| N(3)-C(7)-C(8)-C(9)       | -179.7(2)   | N(9)-C(22)-C(23)-C(24)    | 179.6(2)    |
| C(7)-C(8)-C(9)-C(4)       | -1.3(3)     | C(22)-C(23)-C(24)-C(19)   | 1.2(3)      |
| N(1)-C(4)-C(9)-C(8)       | -176.8(2)   | N(7)-C(19)-C(24)-C(23)    | 176.7(2)    |
| C(5)-C(4)-C(9)-C(8)       | 2.1(3)      | C(20)-C(19)-C(24)-C(23)   | -2.0(3)     |
| C(15)-C(10)-C(11)-C(12)   | 0.4(3)      | C(30)-C(25)-C(26)-C(27)   | -0.4(3)     |
| N(4)-C(10)-C(11)-C(12)    | 177.7(2)    | N(10)-C(25)-C(26)-C(27)   | -177.6(2)   |
| C(10)-C(11)-C(12)-C(13) - | 1.4(3)      | C(25)-C(26)-C(27)-C(28)   | 1.3(3)      |
| C(11)-C(12)-C(13)-C(14)   | 0.8(3)      | C(26)-C(27)-C(28)-C(29) - | 0.6(3)      |
| C(11)-C(12)-C(13)-N(5)    | -178.80(19) | C(26)-C(27)-C(28)-N(11)   | 178.75(19)  |
| C(12)-C(13)-C(14)-C(15)   | 0.8(3)      | C(27)-C(28)-C(29)-C(30)   | -0.9(3)     |
| N(5)-C(13)-C(14)-C(15)    | -179.60(19) | N(11)-C(28)-C(29)-C(30)   | 179.69(19)  |
| C(13)-C(14)-C(15)-C(10)   | -1.8(3)     | C(28)-C(29)-C(30)-C(25)   | 1.9(3)      |
| C(13)-C(14)-C(15)-N(6)    | 177.77(17)  | C(28)-C(29)-C(30)-N(12)   | -177.73(18) |
| C(11)-C(10)-C(15)-C(14)   | 1.3(3)      | C(26)-C(25)-C(30)-C(29)   | -1.3(3)     |
| N(4)-C(10)-C(15)-C(14)    | -176.23(19) | N(10)-C(25)-C(30)-C(29)   | 176.2(2)    |
| C(11)-C(10)-C(15)-N(6)    | -178.34(18) | C(26)-C(25)-C(30)-N(12)   | 178.31(19)  |
| N(4)-C(10)-C(15)-N(6)     | 4.2(3)      | N(10)-C(25)-C(30)-N(12)   | -4.2(3)     |
| C(9)-C(4)-N(1)-C(1)       | -3.3(3)     | C(20)-C(19)-N(7)-C(16)    | -177.9(2)   |
| C(5)-C(4)-N(1)-C(1)       | 177.9(2)    | C(24)-C(19)-N(7)-C(16)    | 3.5(3)      |
| C(3)-C(1)-N(1)-C(4)       | -83.4(2)    | C(18)-C(16)-N(7)-C(19)    | 83.0(2)     |
| C(2)-C(1)-N(1)-C(4)       | 152.9(2)    | C(17)-C(16)-N(7)-C(19)    | -153.2(2)   |
| C(6)-C(5)-N(2)-O(2)       | 1.5(3)      | C(21)-C(20)-N(8)-O(8)     | -1.2(3)     |
| C(4)-C(5)-N(2)-O(2)       | -178.37(19) | C(19)-C(20)-N(8)-O(8)     | 178.4(2)    |
| C(6)-C(5)-N(2)-O(1)       | -179.01(18) | C(21)-C(20)-N(8)-O(7)     | 178.99(18)  |
| C(4)-C(5)-N(2)-O(1)       | 1.1(3)      | C(19)-C(20)-N(8)-O(7)     | -1.5(3)     |
| C(6)-C(7)-N(3)-N(4)       | 177.17(19)  | C(21)-C(22)-N(9)-N(10)    | -176.89(19) |
| C(8)-C(7)-N(3)-N(4)       | -3.3(3)     | C(23)-C(22)-N(9)-N(10)    | 3.9(3)      |
| C(7)-N(3)-N(4)-C(10)      | -178.57(17) | C(22)-N(9)-N(10)-C(25)    | 178.51(17)  |
| C(15)-C(10)-N(4)-N(3)     | -177.34(19) | C(30)-C(25)-N(10)-N(9)    | 177.07(18)  |
| C(11)-C(10)-N(4)-N(3)     | 5.4(3)      | C(26)-C(25)-N(10)-N(9)    | -5.7(3)     |
| C(14)-C(13)-N(5)-O(4)     | -0.1(3)     | C(29)-C(28)-N(11)-O(10)   | 0.0(3)      |
| C(12)-C(13)-N(5)-O(4)     | 179.5(2)    | C(27)-C(28)-N(11)-O(10)   | -179.46(19) |
| C(14)-C(13)-N(5)-O(3)     | -179.9(2)   | C(29)-C(28)-N(11)-O(9)    | 179.8(2)    |
| C(12)-C(13)-N(5)-O(3)     | -0.3(3)     | C(27)-C(28)-N(11)-O(9)    | 0.4(3)      |
| C(14)-C(15)-N(6)-O(5)     | -115.9(2)   | C(29)-C(30)-N(12)-O(12)   | 115.6(2)    |
| C(10)-C(15)-N(6)-O(5)     | 63.7(3)     | C(25)-C(30)-N(12)-O(12)   | -64.0(3)    |
| C(14)-C(15)-N(6)-O(6)     | 62.8(2)     | C(29)-C(30)-N(12)-O(11)   | -62.5(3)    |
| C(10)-C(15)-N(6)-O(6)     | -117.6(2)   | C(25)-C(30)-N(12)-O(11)   | 117.8(2)    |

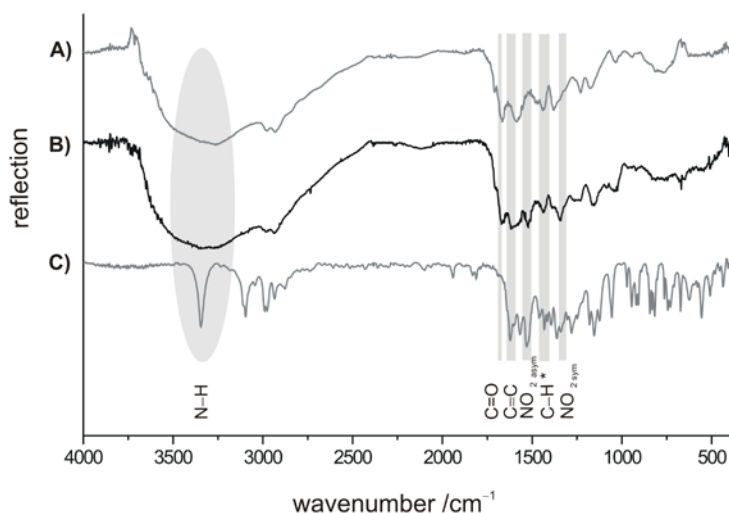

**Figure S1** FTIR spectra of A) pure PVAm, B) **5P** (10 mol%) and C) **5M** in diffuse reflections diluted with KBr. The asterisk (\*) indicates deformation vibrations.

**Table S5:** Glass transition temperatures  $T_g$ , weight loss of the azobenzene-functionalized PVAm and decomposition temperatures  $T_d$  of the model compounds (mc).

| functionalized | $n_F:n_{PVAm}$ | $T_g / ^\circ C$ | weight loss /% via TGA |            | $T_d / ^\circ C$ (mc) <sup>a</sup> |
|----------------|----------------|------------------|------------------------|------------|------------------------------------|
| PVAm           | /Mol%          | via DSC          | 100-170 °C             | 200-400 °C | via TGA                            |
|                | 1              | 73               | 0                      | 62.5       |                                    |
| <b>2P</b>      | 5              | 76               | 6.6                    | 55.3       | 316                                |
|                | 10             | 97               | 4.1                    | 59.3       |                                    |
| <b>3P</b>      | 1              | 105              | 7.5                    | 47.9       |                                    |
|                | 5              | 106              | 4.8                    | 58.6       | 285                                |
|                | 10             | 105              | 3.5                    | 60.8       |                                    |
| <b>4P</b>      | 1              | 95               | 4.5                    | 60.3       |                                    |
|                | 5              | 77               | 9.0                    | 49.7       | 321                                |
|                | 10             | 91               | 13.7                   | 39.6       |                                    |
| <b>5P</b>      | 1              | 104              | 4.5                    | 62.2       |                                    |
|                | 5              | 96               | 4.2                    | 56.4       | 310                                |
|                | 10             | 111              | 4.5                    | 46.9       |                                    |

<sup>a</sup>  $T_d$  (mc) = decomposition temperature where there is > 95 wt loss under helium.



**Table S6:** Kamlet–Taft- und Catalán parameter sets.

| solvent                       | Kamlet–Taft<br>parameter set <sup>S1,2</sup> |         |         |           | Catalán<br>parameter set <sup>S3–S5</sup> |            |                 |                 |
|-------------------------------|----------------------------------------------|---------|---------|-----------|-------------------------------------------|------------|-----------------|-----------------|
|                               | $\alpha$                                     | $\beta$ | $\pi^*$ | <i>SA</i> | <i>SB</i>                                 | <i>SPP</i> | <i>SP</i>       | <i>SdP</i>      |
| gas phase                     | 0                                            | 0       | −1.26   | 0         | 0                                         | 0          | 0               | 0               |
| <i>n</i> -hexane              | 0.00                                         | 0.00    | −0.04   | 0.000     | 0.056                                     | 0.519      | 0.616           | 0               |
| triethylamine                 | 0.00                                         | 0.71    | 0.14    | 0.000     | 0.885                                     | 0.617      | 0.660           | 0.108           |
| diethyl ether                 | 0.00                                         | 0.47    | 0.27    | 0.000     | 0.562                                     | 0.694      | 0.617           | 0.385           |
| tetrachlormethane             | 0.00                                         | 0.10    | 0.28    | 0.000     | 0.044                                     | 0.632      | 0.768           | 0               |
| <i>p</i> -xylene              | 0.00                                         | 0.12    | 0.43    | 0.000     | 0.160                                     | 0.617      | 0.778           | 0.175           |
| toluene                       | 0.00                                         | 0.11    | 0.54    | 0.000     | 0.128                                     | 0.655      | 0.782           | 0.284           |
| 1,4-dioxane                   | 0.00                                         | 0.37    | 0.55    | 0.000     | 0.444                                     | 0.701      | 0.737           | 0.312           |
| ethyl acetate                 | 0.00                                         | 0.45    | 0.55    | 0.000     | 0.542                                     | 0.795      | 0.656           | 0.603           |
| tetrahydrofuran               | 0.00                                         | 0.55    | 0.58    | 0.000     | 0.591                                     | 0.838      | 0.714           | 0.634           |
| benzene                       | 0.00                                         | 0.10    | 0.59    | 0.000     | 0.124                                     | 0.667      | 0.793           | 0.270           |
| anisole                       | 0.00                                         | 0.32    | 0.73    | 0.084     | 0.299                                     | 0.823      | 0.820           | 0.543           |
| 1,2-dichloroethane            | 0.00                                         | 0.10    | 0.81    | 0.030     | 0.126                                     | 0.890      | 0.771           | 0.742           |
| tetramethylurea               | 0.00                                         | 0.80    | 0.83    | 0.000     | 0.624                                     | 0.952      | 0.778           | 0.878           |
| pyridine                      | 0.00                                         | 0.64    | 0.87    | 0.033     | 0.581                                     | 0.922      | 0.841           | 0.761           |
| HMPA <sup>a)</sup>            | 0.00                                         | 1.05    | 0.87    | 0.000     | 0.813                                     | 0.932      | 0.774           | 1.100           |
| <i>N,N</i> -dimethylformamide | 0.00                                         | 0.69    | 0.88    | 0.031     | 0.613                                     | 0.939      | 0.759           | 0.977           |
| <i>N,N</i> -dimethylacetamide | 0.00                                         | 0.76    | 0.88    | 0.028     | 0.650                                     | 0.930      | 0.763           | 0.987           |
| benzonitrile                  | 0.00                                         | 0.37    | 0.90    | 0.047     | 0.281                                     | 0.960      | 0.851           | 0.852           |
| 1,1,2,2-tetrachlorethane      | 0.00                                         | 0.00    | 0.95    | 0.043     | 0.017                                     | 0.887      | 0.845           | 0.792           |
| dimethyl sulfoxid             | 0.00                                         | 0.76    | 1.00    | 0.072     | 0.647                                     | 1.000      | 0.830           | 1.000           |
| acetone                       | 0.08                                         | 0.43    | 0.71    | 0.000     | 0.475                                     | 0.881      | 0.651           | 0.907           |
| dichloromethane               | 0.13                                         | 0.10    | 0.82    | 0.040     | 0.178                                     | 0.876      | 0.761           | 0.769           |
| acetonitrile                  | 0.19                                         | 0.40    | 0.75    | 0.044     | 0.286                                     | 0.895      | 0.645           | 0.974           |
| chloroform                    | 0.20                                         | 0.10    | 0.53    | 0.047     | 0.071                                     | 0.786      | 0.783           | 0.614           |
| nitromethane                  | 0.22                                         | 0.06    | 0.85    | 0.078     | 0.236                                     | 0.907      | 0.710           | 0.954           |
| 1-decanol                     | 0.70                                         | 0.82    | 0.45    | 0.259     | 0.912                                     | 0.765      | 0.722           | 0.383           |
| formamide                     | 0.71                                         | 0.48    | 0.97    | 0.549     | 0.414                                     | 0.833      | 0.814           | 1.006           |
| 2-propanol                    | 0.76                                         | 0.84    | 0.48    | 0.283     | 0.830                                     | 0.848      | 0.633           | 0.808           |
| 1-butanol                     | 0.84                                         | 0.84    | 0.47    | 0.341     | 0.809                                     | 0.837      | 0.674           | 0.655           |
| 1-propanol                    | 0.84                                         | 0.90    | 0.52    | 0.367     | 0.782                                     | 0.847      | 0.658           | 0.748           |
| ethanol                       | 0.86                                         | 0.75    | 0.54    | 0.400     | 0.658                                     | 0.853      | 0.633           | 0.783           |
| 1,2-ethanediol                | 0.90                                         | 0.52    | 0.92    | 0.717     | 0.534                                     | 0.932      | 0.771           | 0.910           |
| methanol                      | 0.98                                         | 0.66    | 0.60    | 0.605     | 0.545                                     | 0.857      | 0.608           | 0.904           |
| water                         | 1.17                                         | 0.47    | 1.09    | 1.062     | 0.025                                     | 0.962      | 0.681           | 0.997           |
| 2,2,2-trifluoroethanol        | 1.51                                         | 0.00    | 0.73    | 0.893     | 0.107                                     | 0.908      | 0.543           | 0.922           |
| HFIP <sup>b)</sup>            | 1.96                                         | 0.00    | 0.65    | 1.011     | 0.014                                     | 1.007      | - <sup>c)</sup> | - <sup>c)</sup> |

<sup>a)</sup> hexamethylphosphoramide, <sup>b)</sup> 1,1,1,3,3,3-hexafluoro-2-propanol, <sup>c)</sup> value was not determined.

**Table S7.** UV/vis absorption maxima of **2M–5M** and of **2P–5P** measured in 34 solvents of different polarity and hydrogen bond ability.

| solvent                                            | $\tilde{\nu}_{\max} / 10^3 \text{ cm}^{-1}$ |                |                |                |                |                |                |                |
|----------------------------------------------------|---------------------------------------------|----------------|----------------|----------------|----------------|----------------|----------------|----------------|
|                                                    | 2M                                          | 3M             | 4M             | 5M             | 2P             | 3P             | 4P             | 5P             |
| <i>n</i> -hexane                                   | 23.31                                       | 27.47          | 25.13          | 23.40          | - <sup>f</sup> | - <sup>f</sup> | - <sup>f</sup> | - <sup>f</sup> |
| triethylamine                                      | 22.03                                       | 27.25          | 25.00          | 23.47          | - <sup>f</sup> | - <sup>f</sup> | 24.10          | - <sup>f</sup> |
| diethyl ether                                      | 22.22                                       | 27.25          | 24.94          | 23.64          | - <sup>f</sup> | - <sup>f</sup> | - <sup>f</sup> | - <sup>f</sup> |
| tetrachloromethane                                 | 22.77                                       | 27.03          | 24.69          | 23.15          | - <sup>f</sup> | 25.45          | - <sup>f</sup> | - <sup>f</sup> |
| <i>p</i> -xylene                                   | 22.47                                       | 26.74          | 24.45          | 22.99          | - <sup>f</sup> | - <sup>f</sup> | - <sup>f</sup> | - <sup>f</sup> |
| toluene                                            | 22.42                                       | 26.67          | 24.39          | 22.99          | - <sup>f</sup> | - <sup>f</sup> | - <sup>f</sup> | - <sup>f</sup> |
| 1,4-dioxane                                        | 22.12                                       | 26.67          | 24.51          | 23.20          | - <sup>f</sup> | 26.25          | - <sup>f</sup> | 23.47          |
| ethyl acetate                                      | 21.79                                       | 26.88          | 24.63          | 23.64          | - <sup>f</sup> | - <sup>f</sup> | - <sup>f</sup> | - <sup>f</sup> |
| tetrahydrofuran                                    | 21.32                                       | 26.60          | 24.39          | 23.26          | - <sup>f</sup> | - <sup>f</sup> | 24.69          | - <sup>f</sup> |
| benzene                                            | 22.37                                       | 26.60          | 24.39          | 22.99          | - <sup>f</sup> | - <sup>f</sup> | - <sup>f</sup> | - <sup>f</sup> |
| anisole                                            | 21.74                                       | 26.39          | 24.15          | 22.88          | - <sup>f</sup> | - <sup>f</sup> | - <sup>f</sup> | - <sup>f</sup> |
| 1,2-dichloroethane                                 | 21.74                                       | 26.67          | 24.27          | 23.20          | - <sup>f</sup> | - <sup>f</sup> | - <sup>f</sup> | - <sup>f</sup> |
| tetramethylurea                                    | 20.33                                       | 26.32          | 24.10          | 23.20          | - <sup>f</sup> | - <sup>f</sup> | 23.42          | 23.31          |
| pyridine                                           | 20.37                                       | 26.25          | 23.92          | 22.99          | - <sup>f</sup> | - <sup>f</sup> | - <sup>f</sup> | - <sup>f</sup> |
| HMPA <sup>a</sup>                                  | 19.76                                       | 26.17          | 24.04          | 23.20          | - <sup>f</sup> | 25.38          | 23.47          | - <sup>f</sup> |
| DMF                                                | 20.41                                       | 26.32          | 24.15          | 23.26          | 21.88          | 25.38          | 24.39          | 23.94          |
| DMAA <sup>b</sup>                                  | 20.28                                       | 26.32          | 24.15          | 23.26          | 21.88          | 25.45          | 24.39          | 23.20          |
| benzonitrile                                       | 20.79                                       | 26.32          | 24.04          | 22.88          | - <sup>f</sup> | - <sup>f</sup> | - <sup>f</sup> | - <sup>f</sup> |
| TCE <sup>c</sup>                                   | 21.46                                       | 26.67          | 24.10          | 22.88          | - <sup>f</sup> | - <sup>f</sup> | - <sup>f</sup> | - <sup>f</sup> |
| DMSO                                               | 19.96                                       | 26.11          | 23.92          | 23.20          | 21.51          | 25.32          | 24.21          | 22.99          |
| acetone                                            | 21.36                                       | 26.74          | 24.51          | 23.64          | - <sup>f</sup> | - <sup>f</sup> | - <sup>f</sup> | - <sup>f</sup> |
| dichloromethane                                    | 21.88                                       | 26.67          | 24.27          | 23.20          | - <sup>f</sup> | - <sup>f</sup> | - <sup>f</sup> | - <sup>f</sup> |
| acetonitrile                                       | 21.55                                       | 26.67          | 24.63          | 23.64          | - <sup>f</sup> | 25.84          | - <sup>f</sup> | - <sup>f</sup> |
| chloroform                                         | 22.03                                       | 26.81          | 24.33          | 23.20          | - <sup>f</sup> | - <sup>f</sup> | - <sup>f</sup> | - <sup>f</sup> |
| nitromethane                                       | 21.28                                       | 26.18          | 24.33          | 23.31          | - <sup>f</sup> | - <sup>f</sup> | - <sup>f</sup> | - <sup>f</sup> |
| 1-decanol                                          | 20.79                                       | 26.88          | 24.51          | 23.26          | - <sup>f</sup> | - <sup>f</sup> | - <sup>f</sup> | - <sup>f</sup> |
| formamide                                          | 20.33                                       | 26.46          | - <sup>f</sup> | 23.20          | 22.03          | 25.45          | 24.75          | 23.26          |
| 2-propanol                                         | 20.88                                       | 27.25          | 24.63          | 23.64          | 22.32          | - <sup>f</sup> | - <sup>f</sup> |                |
| 1-butanol                                          | 20.75                                       | 26.95          | 24.63          | 23.58          |                | - <sup>f</sup> | - <sup>f</sup> | 23.47          |
| 1-propanol                                         | 20.62                                       | 26.95          | 24.63          | 23.53          | 22.27          | 25.38          | 24.51          | 23.70          |
| ethanol                                            | 20.92                                       | 27.03          | 24.75          | 23.70          | 22.22          | 25.77          | 24.69          | 23.64          |
| 1,2-ethandiol                                      | - <sup>f</sup>                              | 26.32          | - <sup>f</sup> | 23.56          | - <sup>f</sup> | - <sup>f</sup> | - <sup>f</sup> | - <sup>f</sup> |
| methanol                                           | 21.14                                       | 26.95          | 24.69          | 23.70          | 22.37          | 26.25          | 24.81          | 23.75          |
| water                                              | - <sup>f</sup>                              | - <sup>f</sup> | - <sup>f</sup> | - <sup>f</sup> | 22.17          | 27.03          | 24.69          | 23.04          |
| TFE <sup>d</sup>                                   | 20.92                                       | 26.95          | 24.88          | 23.75          | 22.83          | 26.53          | - <sup>f</sup> | 24.03          |
| HFIP <sup>e</sup>                                  | 20.12                                       | 26.91          | 24.69          | 23.47          | - <sup>f</sup> | 27.03          | 25.97          | 24.45          |
| $\Delta \tilde{\nu}_{\max} (10^3 \text{ cm}^{-1})$ | 3550                                        | 1363           | 1200           | 870            | 1320           | 1650           | 2550           | 1460           |

<sup>a</sup> Hexamethylphosphoramide. <sup>b</sup> Dimethyl acetamide. <sup>c</sup> 1,1,2,2-Tetrachloroethane. <sup>d</sup> 2,2,2-Trifluoroethanol. <sup>e</sup> 1,1,1,3,3,3-Hexafluoro-2-propanol. <sup>f</sup> not soluble,

**Table S8.** Solvent-independent correlation coefficients *a*, *b* and *c* of the Catalán parameters *SA*, *SB* and *SPP*, solute property of the reference system  $\tilde{\nu}_{\max,0}$  (gas phase), number of solvents (*n*), correlation coefficient (*r*), standard deviation (*sd*), and significance (*f*) of the calculated solvatochromism of the model compounds **2M–5M**

| Comp.     | $\tilde{\nu}_{\max,0} / 10^3 \text{ cm}^{-1}$ | <i>a</i> | <i>b</i> | <i>c</i> | <i>n</i> | <i>r</i> | <i>sd</i> | <i>f</i> |
|-----------|-----------------------------------------------|----------|----------|----------|----------|----------|-----------|----------|
| <b>2M</b> | 26.244                                        | -0.373   | -1.298   | -5.210   | 33       | 0.951    | 0.268     | < 0.0001 |
| <b>3M</b> | 28.483                                        | 0.543    | 0        | -2.265   | 34       | 0.735    | 0.238     | < 0.0001 |
| <b>4M</b> | 25.949                                        | 0.797    | 0        | -1.950   | 32       | 0.804    | 0.184     | < 0.0001 |
| <b>5M</b> | 23.613                                        | 0.849    | 0.357    | -0.742   | 30       | 0.765    | 0.175     | < 0.0001 |

**Table S9.** Solvent-independent correlation coefficients *a*, *b* and *d* of the Catalán parameters *SA*, *SB* and *SP*, solute property of the reference system  $\tilde{\nu}_{\max,0}$  (gas phase), number of solvents (*n*), correlation coefficient (*r*), standard deviation (*sd*), and significance (*f*) of the calculated solvatochromism of the model compounds **2M–5M**

| Comp.     | $\tilde{\nu}_{\max,0} / 10^3 \text{ cm}^{-1}$ | <i>a</i> | <i>b</i> | <i>d</i> | <i>n</i> | <i>r</i> | <i>sd</i> | <i>f</i> |
|-----------|-----------------------------------------------|----------|----------|----------|----------|----------|-----------|----------|
| <b>2M</b> | 26.739                                        | -1.998   | -2.110   | -5.812   | 33       | 0.798    | 0.523     | < 0.0001 |
| <b>3M</b> | 29.320                                        | -0.206   | -0.214   | -3.442   | 34       | 0.700    | 0.251     | < 0.0001 |
| <b>4M</b> | 27.382                                        | -0.291   | -0.217   | -3.885   | 32       | 0.865    | 0.158     | < 0.0001 |
| <b>5M</b> | 25.580                                        | 0.182    | 0        | -3.148   | 33       | 0.944    | 0.086     | < 0.0001 |

**Table S10.** Solvent-independent correlation coefficients *a*, *b* and *c* of the Catalán parameters *SA*, *SB* and *SPP*, solute property of the reference system  $\tilde{\nu}_{\max,0}$  (gas phase), number of solvents (*n*), correlation coefficient (*r*), standard deviation (*sd*), and significance (*f*) of the calculated solvatochromism of the model compounds **2P–5P**

| Comp.     | $\tilde{\nu}_{\max,0} / 10^3 \text{ cm}^{-1}$ | <i>a</i> | <i>b</i> | <i>c</i> | <i>n</i> | <i>r</i> | <i>sd</i> | <i>f</i> |
|-----------|-----------------------------------------------|----------|----------|----------|----------|----------|-----------|----------|
| <b>2P</b> | 26.552                                        | 0        | -1.032   | -6.182   | 9        | 0.922    | 0.145     | < 0.0014 |
| <b>3P</b> | 28.311                                        | 0.516    | -1.127   | -2.318   | 11       | 0.933    | 0.156     | < 0.0005 |
| <b>4P</b> | 24.635                                        | 0.922    | -0.838   | 0        | 13       | 0.896    | 0.332     | < 0.0002 |
| <b>5P</b> | 24.045                                        | 1.173    | 0        | -1.010   | 12       | 0.920    | 0.175     | < 0.0002 |

### UV/vis absorption spectra measured as powders

Generally, the UV/vis absorption bands are non-symmetric and show several absorption maxima. As depicted in Figure S3 (B, **5M** and **5P**), the half-width of the UV/vis absorption bands of the polymers **3P–5P** are broader than the half-width of the UV/vis absorption bands of the model compounds. The amino groups of the PVAm generate an internal basic surrounding and therefore a bathochromic shift is observed. In contrast, **2P** shows a smaller UV/vis absorption band and a hypsochromic shift compared to **2M**. These results are in

agreement with the pH-depending UV-vis absorption measurements in aqueous solutions and reflect the strong influence of the amino groups of the polymer chains on the UV/vis spectroscopic behavior of the azobenzene-functionalized PVAMs.

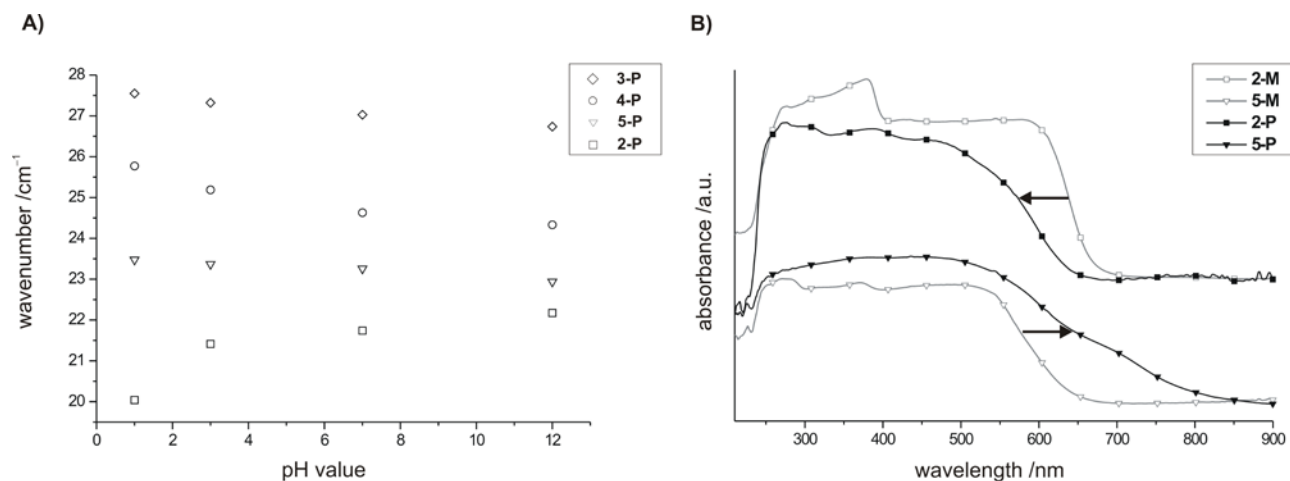

**Figure S2** A) Positions of the UV/vis absorption maxima in water with different pH values of **2P–5P** (5 Mol%), and B) UV/vis absorption spectra of the model compounds **2M** and **5M**, and the polymers **2P** and **5P** (5Mol%), resp., as powders.

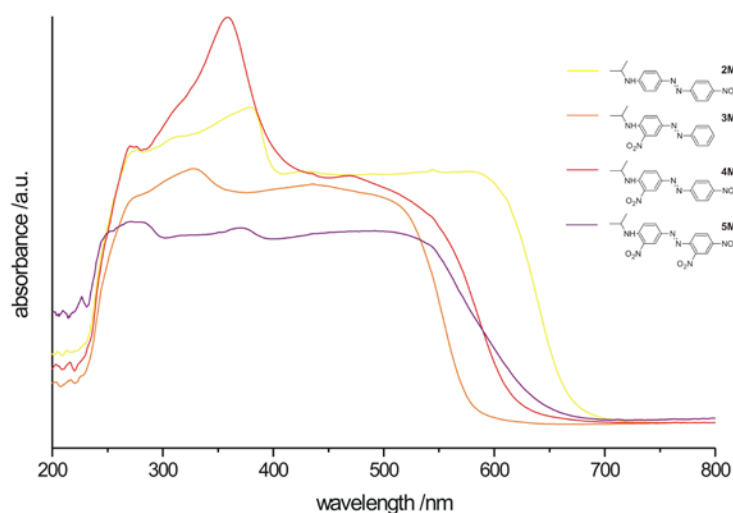

**Figure S3** UV-vis absorption spectra of **2M–5M** as powders.

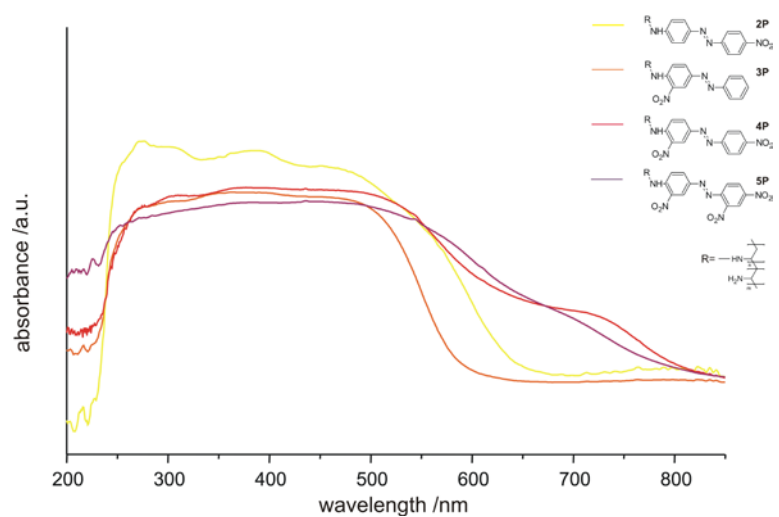

**Figure S4** UV-vis absorption spectra of **2P–5P** as powders.

## References

S1. Reichardt, C. In *Solvents and Solvent Effects in Organic Chemistry*, 2nd edn.; VCH, Weinheim, 1988, and references therein.

S2. Marcus, Y. *Chem. Soc. Rev.* 1993, 22, 409–416.

S3 J. Catalán, In *Handbook of Solvents*, Chem.Tech Publishing Toronto, 2001, Chaper9.3, p 583.

S4. J. Catalán, H. Hopf, *Eur. J. Org. Chem.*, **2004**, 4694–4702.

S5. J. Catalán, *J. Phys Chem. B*, **2009**, 113, 5951–5960.
